# Supplementary material for: Islet inflammation and ductal proliferation may be linked to increased pancreatitis risk in type 2 diabetes
Source: JCI journal article supplement (doi:10.1172/jci.insight.92282), 2017-07-05
Supplement: sd1 [file 1]

770 Supplementary Table 1. The primers used for quantitative RT-PCR.  
 771

| Gene name     | Forward (5' > 3')    | Reverse (5' > 3')    |
|---------------|----------------------|----------------------|
| Human         |                      |                      |
| <i>CXCL1</i>  | GCGCCCAAACCGAAGTCATA | ATGGGGGATGCAGGATTGAG |
| <i>PF4</i>    | CCCCACTGCCCAACTGATAG | TTCTTGTACAGCGGGGCTTG |
| <i>CXCL10</i> | TGCCATTCTGATTTGCTGCC | TGCAGGTACAGCGTACAGTT |
| <i>GAPDH</i>  | CCAGAACATCATCCCTGCCT | CCTGCTTCACCACCTTCTTG |
| Rat           |                      |                      |
| <i>Cxcl1</i>  | GCCACACTCAAGAATGGTCG | TGGGGACACCCTTTAGCATC |
| <i>Pf4</i>    | CTGCTTCTTCTGGGTCTGCT | CCATTCTTCAGCGTGGCTAT |
| <i>Cxcl10</i> | TGCAAGTCTATCCTGTCCGC | TCTTTGGCTCACCGCTTTCA |
| <i>Gapdh</i>  | ATGACTCTACCCACGGCAAG | CTGGAAGATGGTGATGGGTT |

772

773 **SUPPLEMENTARY FIGURES**

774 **Supplementary Figure 1.** A-D. Examples of **pancreatic intraepithelial neoplasia (PanIN)** lesions  
775 identified in **non-diabetic (ND)** individuals (A: donor 6034, low grade PanIN; B: donor 6097, low  
776 grade PanIN; C: donor 6097, low grade PanIN, D: donor 6102, low grade PanIN; all images  
777 acquired with a 20x lens (200x magnification)) stained for Alcian Blue to detect mucin deposition,  
778 insulin (pink) and Ki67 (brown) to mark replicating cells. Scale bar = 50  $\mu$ m.

779

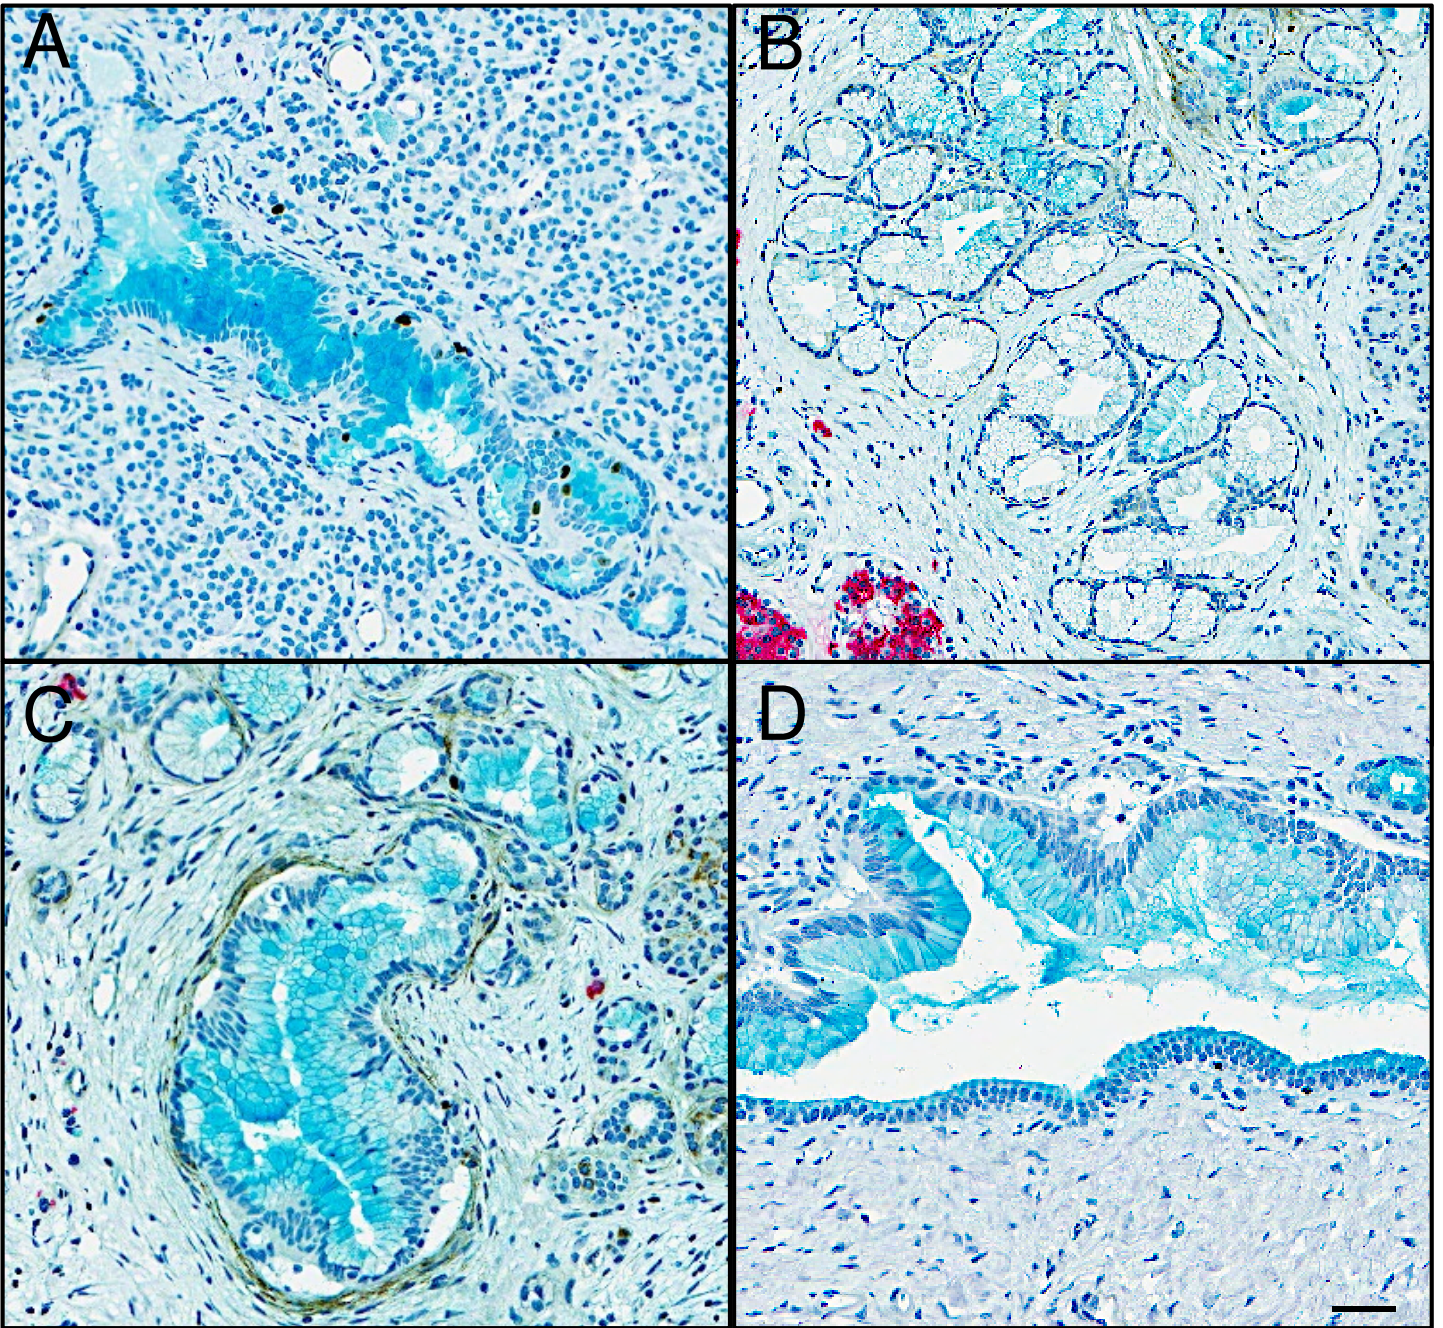

Supplementary Figure 1 Nondiabetic case examples of PanIns

780 **Supplementary Figure 2.** Plasma glucose (A), food intake (B), body weight (C) and pancreatic  
781 weight/body weight\*100 (D) in **human IAPP transgenic (HIP) and wild type (WT)** rats at age 12  
782 weeks **treated or not with Exendin-4 (Ex), metformin (Metf) or combination of the two.** WT n=5,  
783 WT+Ex n=6, WT+Metf n=6, WT+EX+Metf n=6, HIP n=6, HIP+Ex n=6, HIP+Metf n=6,  
784 HIP+Ex+Metf n=6. **Data represent mean  $\pm$  SEM, one-way ANOVA Post Hoc Dunnett's test;**  
785 **\*p<0.05, \*\*p<0.01, \*\*\*p<0.001.**

786

Supp Figure 2

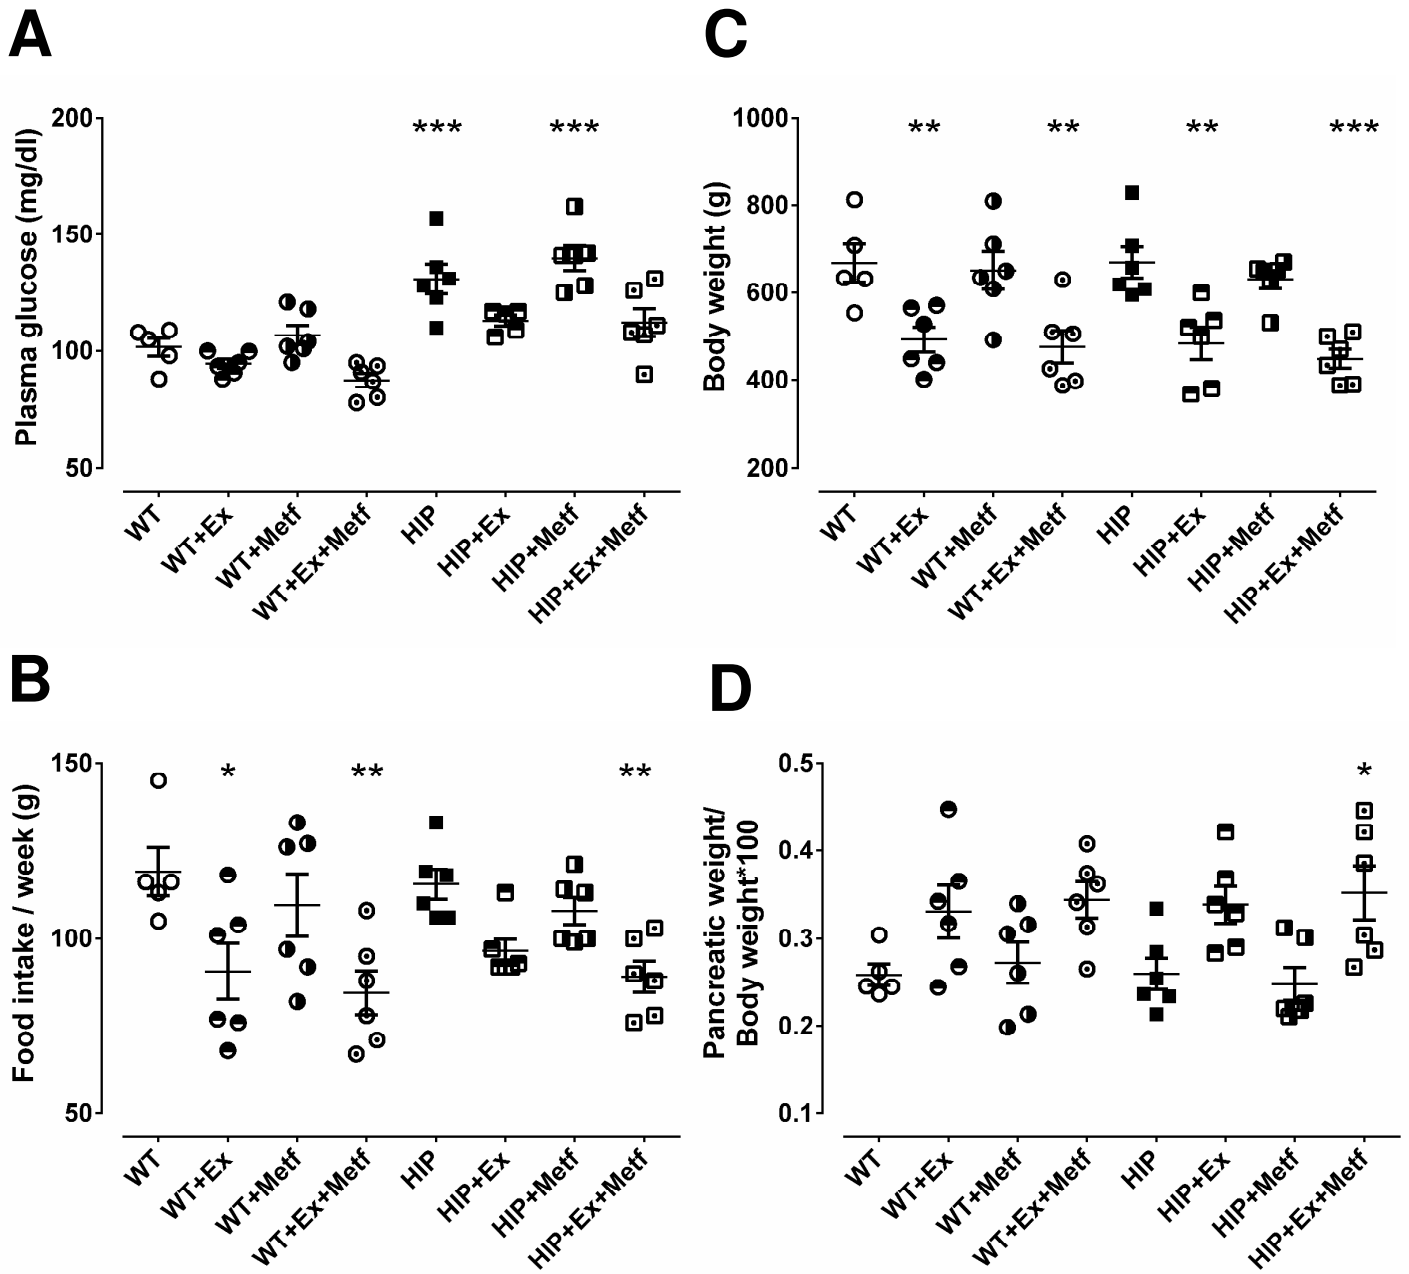

787 **Supplementary Figure 3.** 72-hour chronic glucose infusion (GINF). Plasma glucose (A) and  
788 Plasma insulin (B) (R n=5, C n=3).  
789

Supp Figure 3

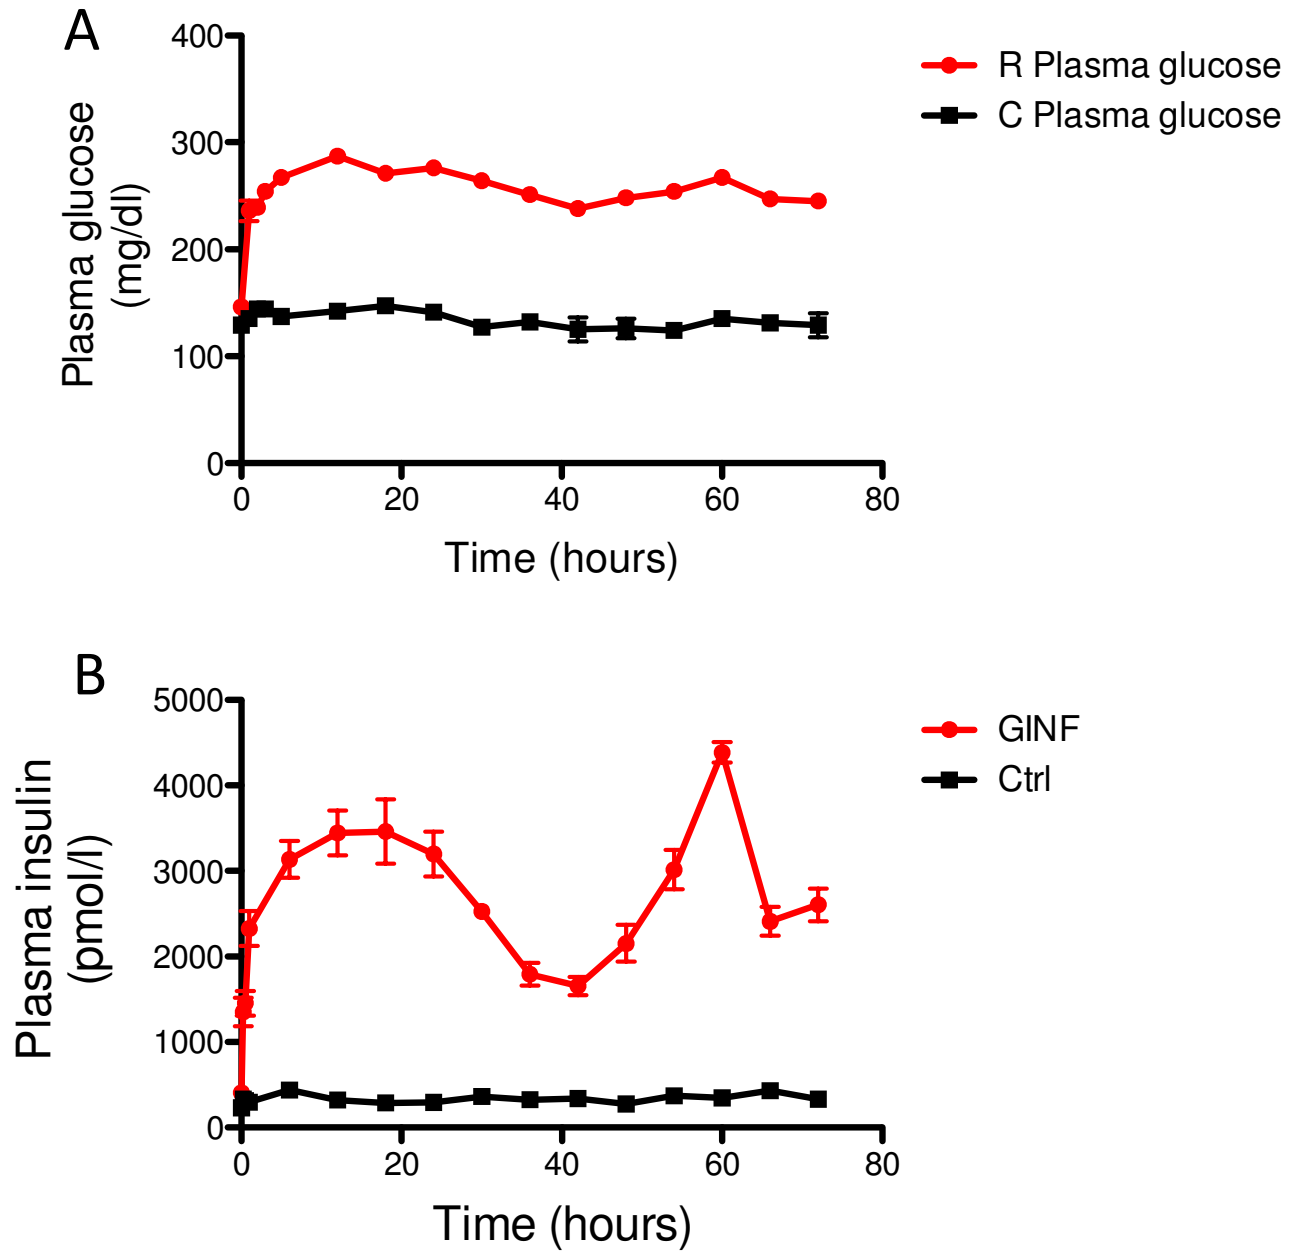

790 **Supplementary Figure 4.** (A) Fold increase in mRNA expression of *Cxcl1*, *Pf4* and *Cxcl10* (n=2)  
791 in **human IAPP transgenic (HIP)** rat islets over wild type (WT) assessed by Microarray. (B) mRNA  
792 levels of chemokines measured by quantitative RT-PCR. *Gapdh* was used as a housekeeping gene.  
793 Quantification was made relative to the average of mRNA in WT. **Data represent mean  $\pm$  SEM;**  
794 **n=3 rats per group; two tailed Student's t test, \* p<0.05.**  
795



Supp Figure 4

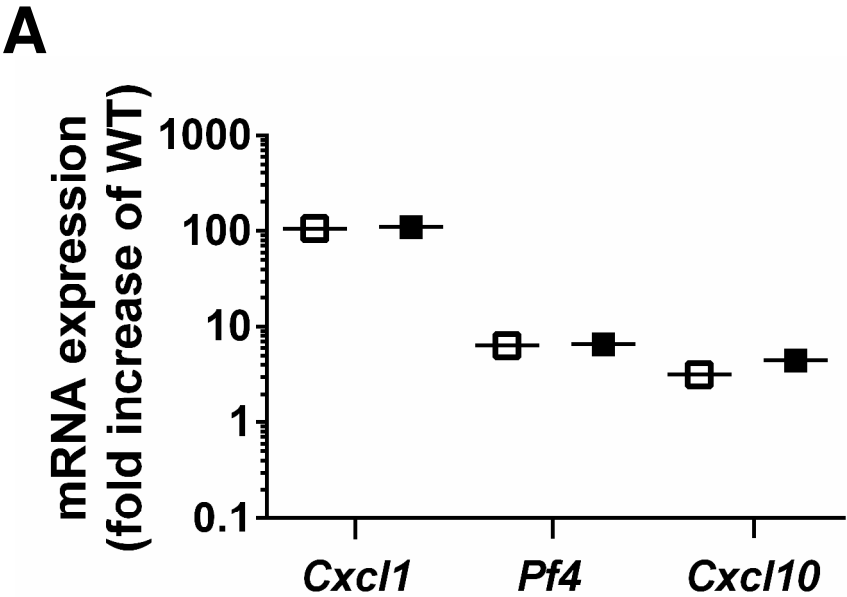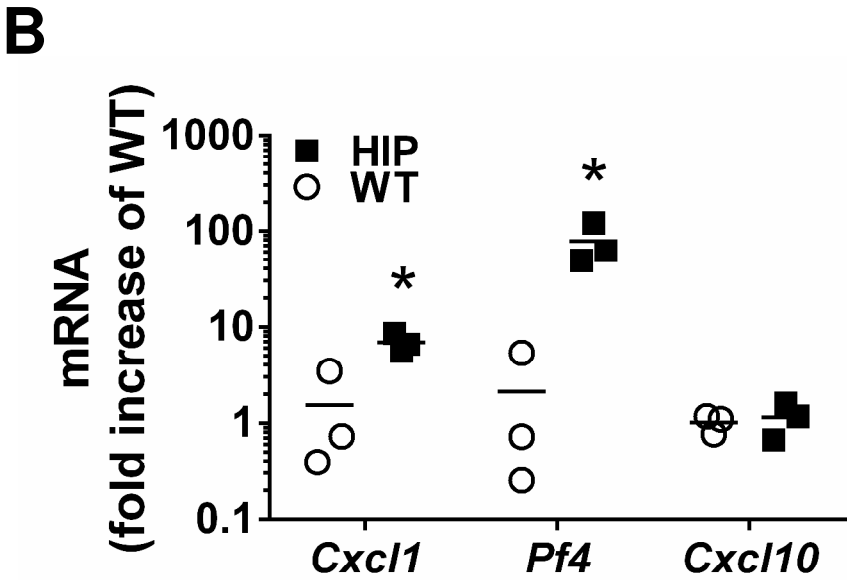

796 **Supplementary Figure 5.** Chemokine expression in human islets. *CXCL1* (A), *PF4* (B) and  
797 *CXCL10* (C) mRNA expression in human islets from 3 **type 2 diabetes mellitus (T2DM)** subjects  
798 (black **squares**) and 8 **non-diabetic (ND)** donors (white **circles**) measured by RT-qPCR; *GAPDH*  
799 was used as a housekeeping gene. Quantification was made relative to a randomly chosen ND.  
800

Supp Figure 5

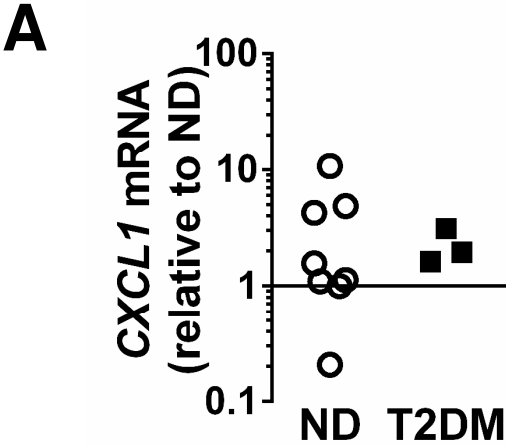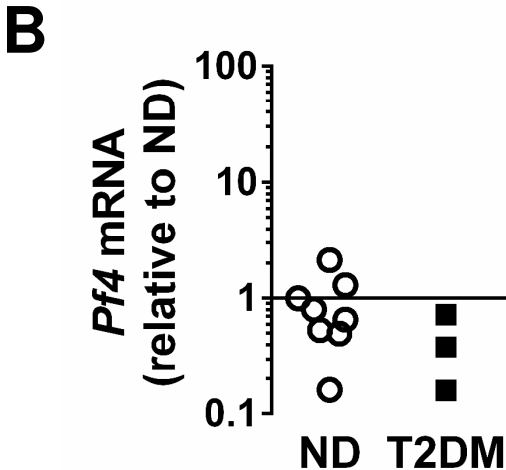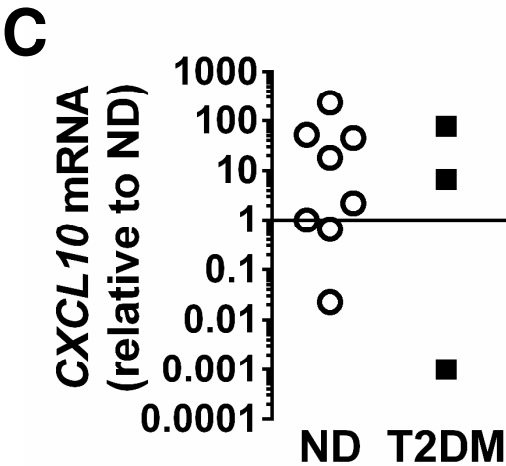

801 **Supplementary Figure 6.** An example of an islet (circled in broken red line) adjacent to a ductal  
802 compartment with a high frequency of replication in the **pancreatic duct gland (PDG)** compartment  
803 (yellow arrows) in **a human IAPP transgenic (HIP)** rat. Insets show higher power examples of  
804 replication in PDGs. Sections are stained for Ki67 with a hematoxylin counterstain. Insets show  
805 higher power views of PDGs, showing Ki67 positive nuclei. Scale bar = 50 $\mu$ m.  
806

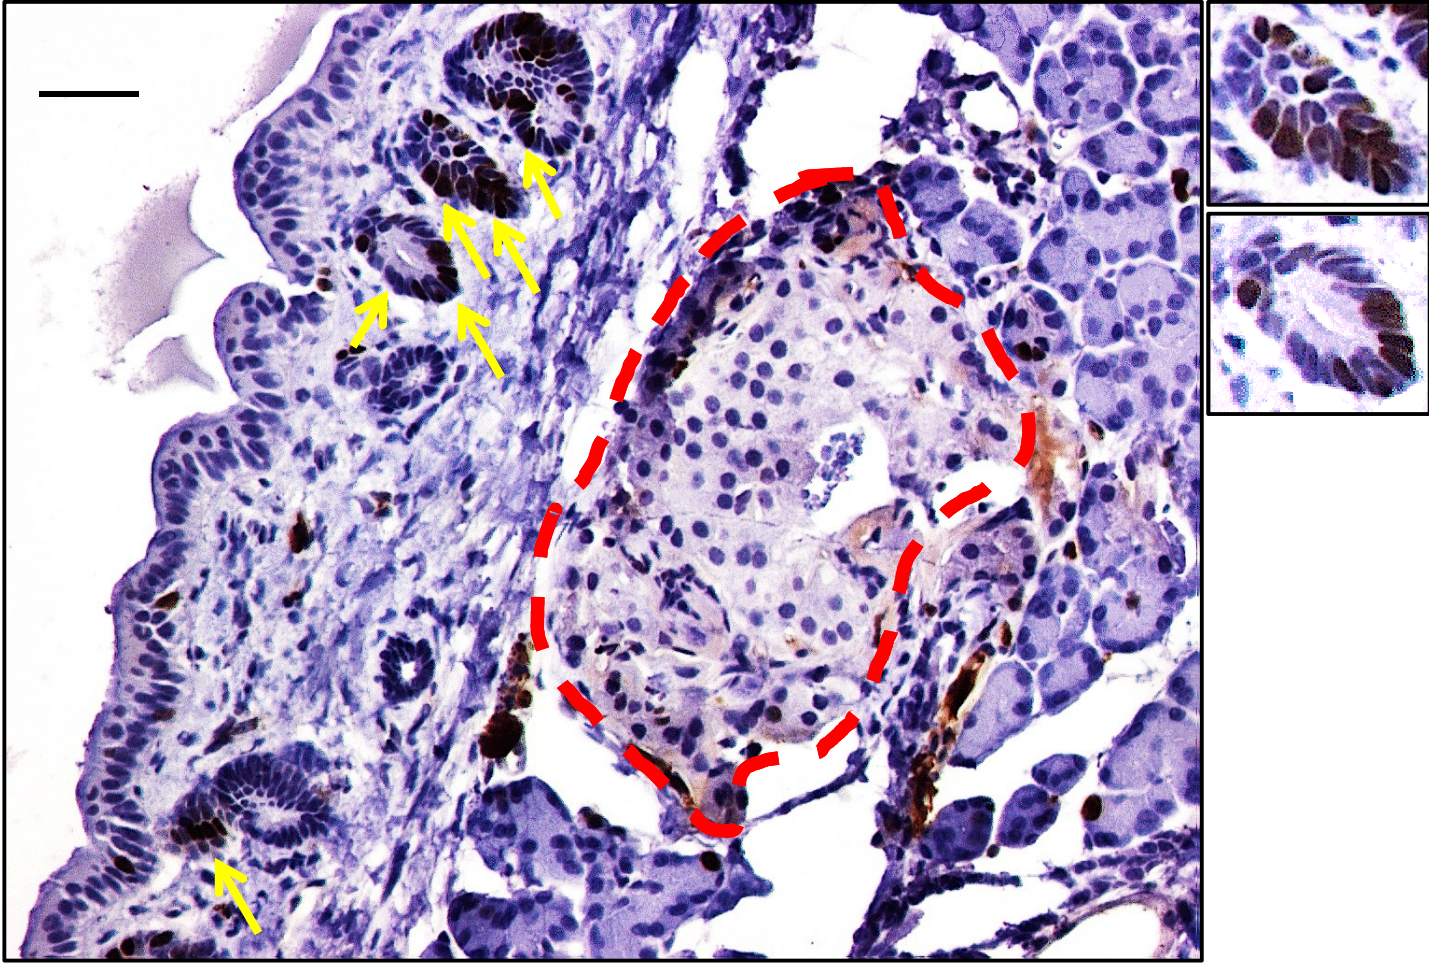

Supp Figure 6

807 **Supplementary Figure 7.** Western Blot analysis showing a time-dependent phosphorylation of  
808 the pro-proliferative MAP kinases ERK1/2 in **human pancreatic duct epithelial (HPDE)** cells  
809 incubated with CXCL1 (A) and in the presence or absence of the anti-CXCL1 neutralizing mouse  
810 monoclonal antibody (**clone MM0208-9A18, ab89318, Abcam, Cambridge, MA**) (B). CXCL1 and  
811 CXCL1 mixture with antibody was pre-incubated for 1 h at 37 °C before addition to cells.  
812

Supplemental Figure 7

**A**

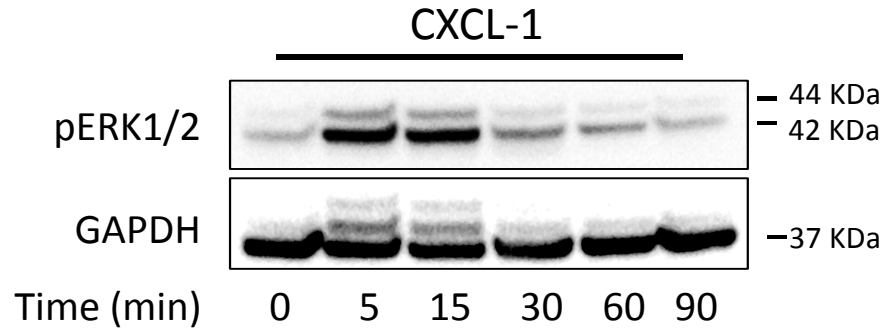

**B**

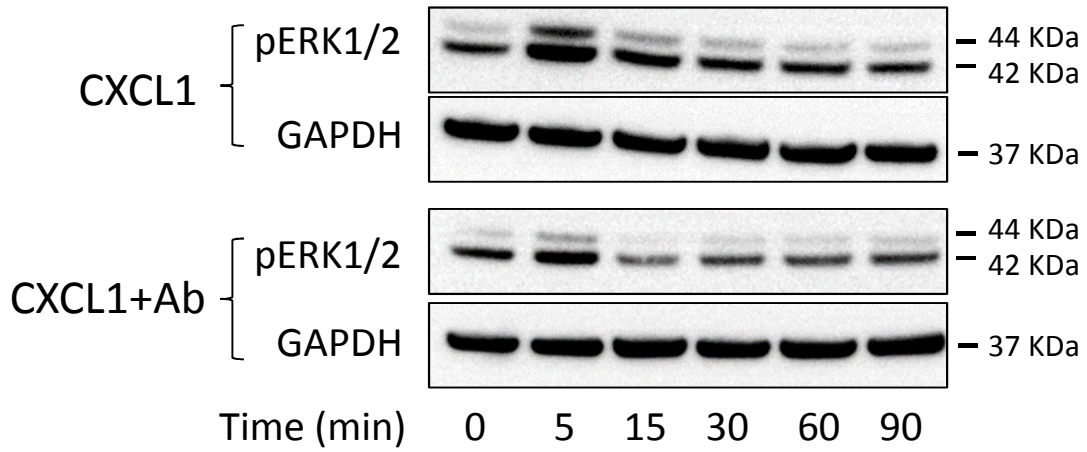

813 **Supplementary Figure 8.** Representative examples of replication in the **pancreatic duct gland**  
814 **(PDG)** compartment in **wild type (WT)** rat (A) and WT rat treated with exendin-4 (B), metformin  
815 (C) and exendin-4+metformin (D). Sections are stained for Ki67 and counterstained with  
816 hematoxylin. Insets show higher power views of Ki67 positive nuclei in PDGs indicated by broken  
817 square in the lower power image. Scale bar = 50µm.

818



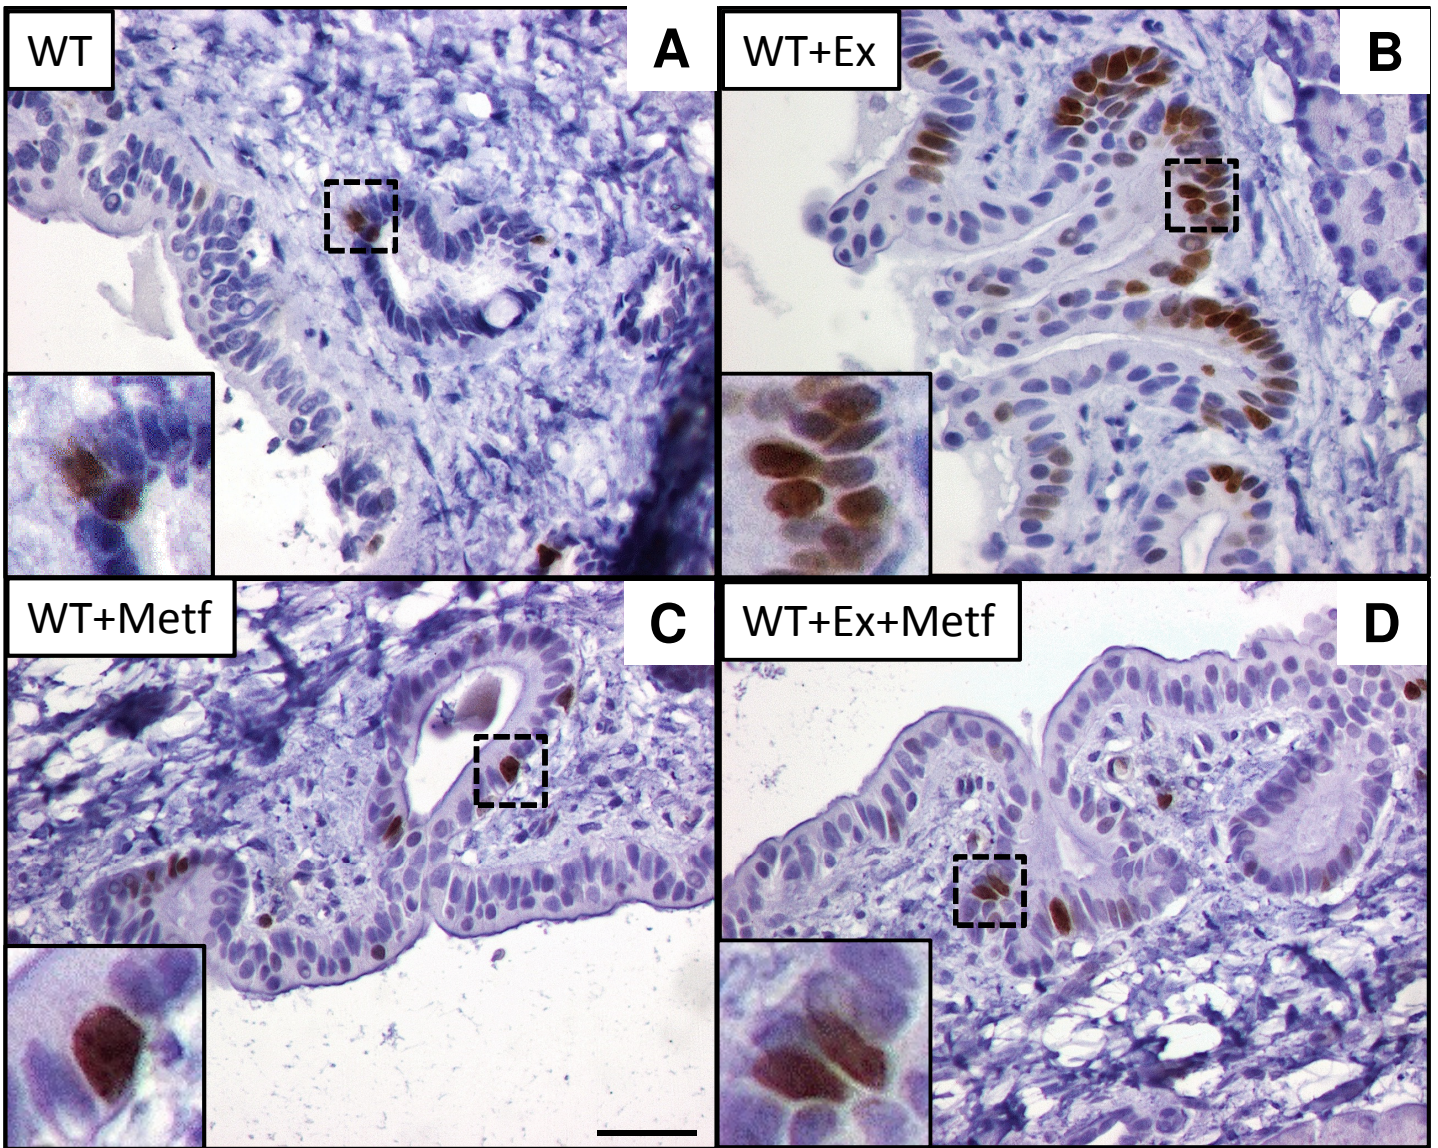

Supplementary Fig 8 per reviewer

819 **Supplementary Figure 9.** Representative examples of replication in the **pancreatic duct gland**  
820 **(PDG) compartment in human IAPP transgenic (HIP) rat (A)** and HIP rat treated with exendin-4  
821 **(B), metformin (C) and exendin-4+metformin (D).** Sections are stained for Ki67 with a  
822 hematoxylin counterstain. Insets show higher power views of Ki67 positive nuclei in PDGs  
823 indicated by broken square in the lower power image of PDGs. Scale bar = 50 $\mu$ m.

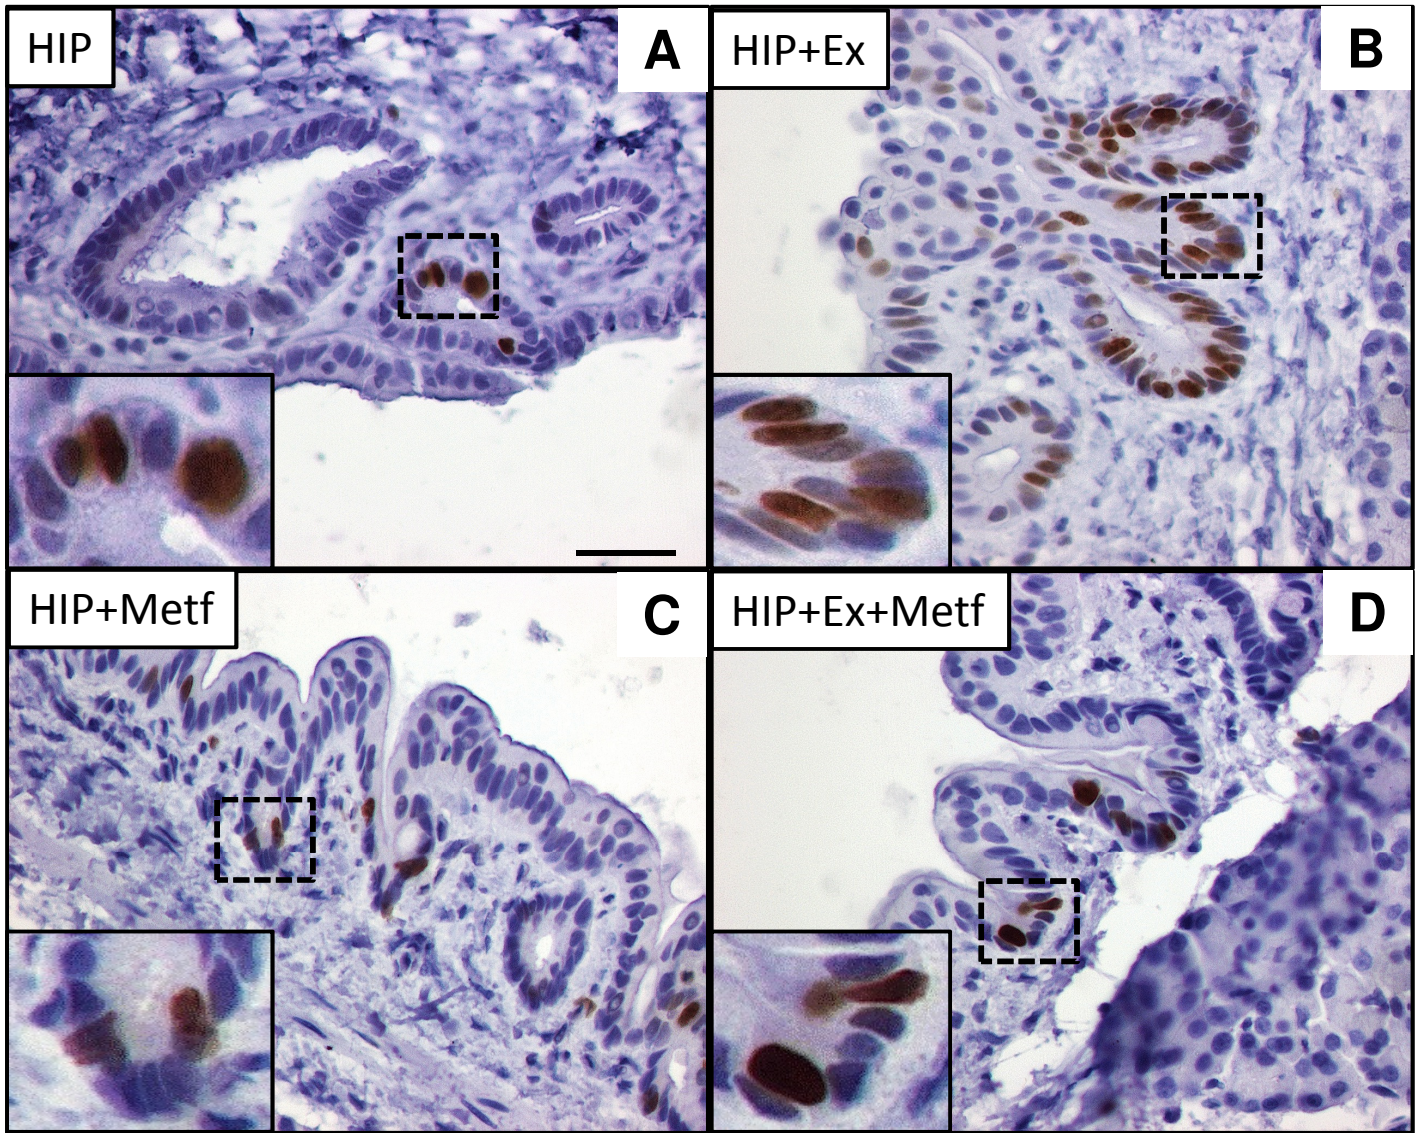

Supplementary Fig 9 per reviewer
